# Supplementary material for: Resting heart rate and risk of dementia: a Mendelian randomization study in the international genomics of Alzheimer’s Project and UK Biobank
Source: PeerJ. 2024 Mar 15;12:e17073. doi: 10.7717/peerj.17073 (PMC10946385; doi:10.7717/peerj.17073)
Supplement: Supplemental Information 2 [file peerj-12-17073-s002.xlsx]

## Sheet: rhr_Ruben16_28_AD_ukb_meta_gsmr
SNP	a1	a2	a1_freq	bzx	bzx_se	bzx_pval	bzx_n	bzy	bzy_se	bzy_pval	bzy_n	std_bzx	std_bzx_se
rs12576326	G	A	0.34	0.2528	0.0356	1.2e-12	265046	-0.0306	0.0169	0.07009	63926	0.0205873	0.00289916
rs17201923	G	A	0.28	-0.4096	0.0367	6.55e-29	265046	0.0136	0.0157	0.3871	63926	-0.0341327	0.00305828
rs1320761	T	C	0.11	0.9018	0.0531	1.22e-64	265046	0.0285	0.0239	0.2334	63926	0.0745097	0.0043873
rs1483890	G	A	0.3	0.2836	0.0359	2.54e-15	265046	-0.0028	0.0155	0.8563	63926	0.0236742	0.00299684
rs7612445	T	G	0.19	-0.4276	0.042	2.41e-24	265046	0.0134	0.0179	0.4549	63926	-0.0356376	0.00350042
rs1260326	C	T	0.39	-0.2746	0.0338	4.29e-16	265046	-0.0147	0.0145	0.3099	63926	-0.0228748	0.00281561
rs12713404	T	G	0.38	-0.1992	0.0347	9.33e-09	265046	-0.0157	0.0148	0.2876	63926	-0.0162431	0.0028295
rs75190942	A	C	0.09	-0.4962	0.0599	1.19e-16	265046	0.0198	0.0328	0.5461	63926	-0.0397517	0.00479873
rs13002735	C	A	0.24	-0.3305	0.0387	1.29e-17	265046	-0.0128	0.0165	0.4389	63926	-0.0274608	0.00321553
rs4868243	A	G	0.16	-0.361	0.0444	4.08e-16	265046	-0.0183	0.0198	0.3545	63926	-0.0304575	0.00374602
rs2358740	T	G	0.32	-0.2079	0.0352	3.58e-09	265046	-0.0139	0.0152	0.3588	63926	-0.0173891	0.00294419
rs4963772	A	G	0.15	-0.7139	0.0465	3.23e-53	265046	0.0082	0.0197	0.6768	63926	-0.0590284	0.00384482
rs7173389	T	A	0.16	-0.5393	0.0453	1.31e-32	265046	0.0231	0.0195	0.2345	63926	-0.0445903	0.00374549
rs1050288	T	C	0.34	-0.2125	0.0357	2.74e-09	265046	0.001	0.0166	0.9497	63926	-0.0172574	0.00289924
rs3915499	A	G	0.32	0.303	0.0354	1.24e-17	265046	-0.004	0.0153	0.7928	63926	0.0251985	0.00294398
rs2152735	A	G	0.33	-0.3061	0.0355	7.23e-18	265046	0.0036	0.0154	0.814	63926	-0.0251828	0.00292058
rs272564	C	A	0.28	0.351	0.0373	4.51e-21	265046	-0.0073	0.0159	0.6488	63926	0.0287809	0.00305849
rs41312411	G	C	0.15	-0.32	0.047	1.34e-11	265046	-0.0193	0.0202	0.3384	63926	-0.0261869	0.0038462
rs41317993	A	G	0.1	0.6304	0.0545	5.42e-31	265046	0.0156	0.025	0.5329	63926	0.0529436	0.00457713
rs6845865	C	T	0.16	-0.3423	0.0448	2.25e-14	265046	-0.013	0.0198	0.512	63926	-0.0286224	0.00374608
rs4900069	C	A	0.37	0.1999	0.0343	5.38e-09	265046	-0.0027	0.0147	0.8535	63926	0.0165785	0.00284463
rs12501032	G	C	0.31	0.2878	0.0362	1.83e-15	265046	0.0115	0.0162	0.4765	63926	0.0236075	0.00296939
rs12889267	G	A	0.16	0.4164	0.0453	3.61e-20	265046	-0.0247	0.0206	0.2311	63926	0.0344325	0.00374589
rs11920570	A	G	0.26	0.2676	0.0371	5.18e-13	265046	-0.0043	0.0163	0.7925	63926	0.0225835	0.00313097
rs1549118	T	C	0.28	0.2003	0.0367	4.67e-08	265046	0.0191	0.0156	0.2211	63926	0.0166944	0.00305883
rs79121763	T	C	0.09	-0.471	0.0629	7.17e-14	265046	-0.0422	0.0298	0.1564	63926	-0.0359341	0.00479884
rs61735998	T	G	0.02	-0.8338	0.109	2.06e-14	265046	0.0388	0.0563	0.4914	63926	-0.0750384	0.00980953
rs2076028	A	G	0.29	-0.2949	0.0364	5.45e-16	265046	-0.0272	0.0161	0.08972	63926	-0.0245197	0.00302651
rs17265513	C	T	0.19	0.2398	0.042	1.12e-08	265046	0.0272	0.0189	0.1515	63926	0.0199884	0.00350089
rs16974196	A	G	0.32	0.2436	0.0359	1.11e-11	265046	0.026	0.0163	0.1104	63926	0.0199775	0.00294413
rs11083258	C	A	0.17	-0.2761	0.0445	5.51e-10	265046	0.0019	0.0197	0.9246	63926	-0.0226848	0.0036562

## Sheet: rhr_Ruben16_29_AD_igap_gsmr_std
SNP	a1	a2	a1_freq	bzx	bzx_se	bzx_pval	bzx_n	bzy	bzy_se	bzy_pval	bzy_n	std_bzx	std_bzx_se
rs12576326	G	A	0.34	0.2528	0.0356	1.2e-12	265046	-0.0182	0.0199	0.3618	54162	0.0205873	0.00289916
rs17201923	G	A	0.28	-0.4096	0.0367	6.55e-29	265046	0.0258	0.0173	0.1361	54162	-0.0341327	0.00305828
rs1320761	T	C	0.11	0.9018	0.0531	1.22e-64	265046	0.0359	0.0261	0.1686	54162	0.0745097	0.0043873
rs1483890	G	A	0.3	0.2836	0.0359	2.54e-15	265046	0.0125	0.0168	0.4587	54162	0.0236742	0.00299684
rs7612445	T	G	0.19	-0.4276	0.042	2.41e-24	265046	0.0053	0.0203	0.7932	54162	-0.0356376	0.00350042
rs1260326	C	T	0.39	-0.2746	0.0338	4.29e-16	265046	0.0008	0.0161	0.9608	54162	-0.0228748	0.00281561
rs12713404	T	G	0.38	-0.1992	0.0347	9.33e-09	265046	-0.0014	0.0165	0.9327	54162	-0.0162431	0.0028295
rs75190942	A	C	0.09	-0.4962	0.0599	1.19e-16	265046	0.0289	0.0392	0.4606	54162	-0.0397517	0.00479873
rs4868243	A	G	0.16	-0.361	0.0444	4.08e-16	265046	-0.009	0.0215	0.6763	54162	-0.0304575	0.00374602
rs2358740	T	G	0.32	-0.2079	0.0352	3.58e-09	265046	-0.0186	0.0165	0.2591	54162	-0.0173891	0.00294419
rs4963772	A	G	0.15	-0.7139	0.0465	3.23e-53	265046	-0.0145	0.0215	0.5008	54162	-0.0590284	0.00384482
rs7173389	T	A	0.16	-0.5393	0.0453	1.31e-32	265046	0.008	0.0212	0.7041	54162	-0.0445903	0.00374549
rs1050288	T	C	0.34	-0.2125	0.0357	2.74e-09	265046	0.0158	0.02	0.4306	54162	-0.0172574	0.00289924
rs3915499	A	G	0.32	0.303	0.0354	1.24e-17	265046	-0.0002	0.0165	0.989	54162	0.0251985	0.00294398
rs2152735	A	G	0.33	-0.3061	0.0355	7.23e-18	265046	-0.0012	0.0173	0.9469	54162	-0.0251828	0.00292058
rs272564	C	A	0.28	0.351	0.0373	4.51e-21	265046	-0.011	0.0179	0.5396	54162	0.0287809	0.00305849
rs41312411	G	C	0.15	-0.32	0.047	1.34e-11	265046	-0.0169	0.0229	0.4604	54162	-0.0261869	0.0038462
rs6845865	C	T	0.16	-0.3423	0.0448	2.25e-14	265046	-0.015	0.0224	0.5049	54162	-0.0286224	0.00374608
rs4900069	C	A	0.37	0.1999	0.0343	5.38e-09	265046	0.0056	0.0162	0.7293	54162	0.0165785	0.00284463
rs12501032	G	C	0.31	0.2878	0.0362	1.83e-15	265046	0.0121	0.0183	0.5082	54162	0.0236075	0.00296939
rs12889267	G	A	0.16	0.4164	0.0453	3.61e-20	265046	-0.0334	0.023	0.1466	54162	0.0344325	0.00374589
rs11920570	A	G	0.26	0.2676	0.0371	5.18e-13	265046	-0.0001	0.0177	0.9956	54162	0.0225835	0.00313097
rs1549118	T	C	0.28	0.2003	0.0367	4.67e-08	265046	0.0167	0.0175	0.3408	54162	0.0166944	0.00305883
rs79121763	T	C	0.09	-0.471	0.0629	7.17e-14	265046	-0.0149	0.0396	0.7062	54162	-0.0359341	0.00479884
rs61735998	T	G	0.02	-0.8338	0.109	2.06e-14	265046	-0.0549	0.0889	0.5371	54162	-0.0750384	0.00980953
rs2076028	A	G	0.29	-0.2949	0.0364	5.45e-16	265046	-0.0332	0.0173	0.0549	54162	-0.0245197	0.00302651
rs17265513	C	T	0.19	0.2398	0.042	1.12e-08	265046	0.0099	0.0215	0.6453	54162	0.0199884	0.00350089
rs16974196	A	G	0.32	0.2436	0.0359	1.11e-11	265046	0.0196	0.0185	0.2908	54162	0.0199775	0.00294413
rs11083258	C	A	0.17	-0.2761	0.0445	5.51e-10	265046	0.0112	0.0216	0.6029	54162	-0.0226848	0.0036562

## Sheet: rhr_Ruben16_30_AD_ukb_ma_gsmr_s
SNP	a1	a2	a1_freq	bzx	bzx_se	bzx_pval	bzx_n	bzy	bzy_se	bzy_pval	bzy_n	std_bzx	std_bzx_se
rs12576326	G	A	0.34	0.2528	0.0356	1.2e-12	265046	0.0187829	0.0183874	0.307014	314278	0.0205873	0.00289916
rs17201923	G	A	0.28	-0.4096	0.0367	6.55e-29	265046	-0.00808707	0.0193633	0.676204	314278	-0.0341327	0.00305828
rs1320761	T	C	0.11	0.9018	0.0531	1.22e-64	265046	-0.0379546	0.0296708	0.20083	314278	0.0745097	0.0043873
rs1483890	G	A	0.3	0.2836	0.0359	2.54e-15	265046	0.00866373	0.0191344	0.650706	314278	0.0236742	0.00299684
rs7612445	T	G	0.19	-0.4276	0.042	2.41e-24	265046	0.0130319	0.0224323	0.561278	314278	-0.0356376	0.00350042
rs1260326	C	T	0.39	-0.2746	0.0338	4.29e-16	265046	-0.025353	0.0178662	0.155885	314278	-0.0228748	0.00281561
rs12713404	T	G	0.38	-0.1992	0.0347	9.33e-09	265046	0.0172634	0.0181547	0.341652	314278	-0.0162431	0.0028295
rs75190942	A	C	0.09	-0.4962	0.0599	1.19e-16	265046	0.0501696	0.0302615	0.0973455	314278	-0.0397517	0.00479873
rs13002735	C	A	0.24	-0.3305	0.0387	1.29e-17	265046	0.00174901	0.0205657	0.932226	314278	-0.0274608	0.00321553
rs4868243	A	G	0.16	-0.361	0.0444	4.08e-16	265046	0.00426044	0.0238855	0.858434	314278	-0.0304575	0.00374602
rs2358740	T	G	0.32	-0.2079	0.0352	3.58e-09	265046	-0.00237265	0.0186393	0.898709	314278	-0.0173891	0.00294419
rs4963772	A	G	0.15	-0.7139	0.0465	3.23e-53	265046	0.00677499	0.0244061	0.781324	314278	-0.0590284	0.00384482
rs7173389	T	A	0.16	-0.5393	0.0453	1.31e-32	265046	-0.00645383	0.0239668	0.787713	314278	-0.0445903	0.00374549
rs1050288	T	C	0.34	-0.2125	0.0357	2.74e-09	265046	-0.00671921	0.0186213	0.718223	314278	-0.0172574	0.00289924
rs3915499	A	G	0.32	0.303	0.0354	1.24e-17	265046	-0.0198233	0.0189035	0.294334	314278	0.0251985	0.00294398
rs2152735	A	G	0.33	-0.3061	0.0355	7.23e-18	265046	0.0185888	0.0187342	0.321083	314278	-0.0251828	0.00292058
rs272564	C	A	0.28	0.351	0.0373	4.51e-21	265046	-0.00437256	0.0195944	0.823416	314278	0.0287809	0.00305849
rs41312411	G	C	0.15	-0.32	0.047	1.34e-11	265046	-0.00757263	0.0245737	0.757961	314278	-0.0261869	0.0038462
rs6845865	C	T	0.16	-0.3423	0.0448	2.25e-14	265046	-0.000424977	0.0241152	0.98594	314278	-0.0286224	0.00374608
rs4900069	C	A	0.37	0.1999	0.0343	5.38e-09	265046	-0.010746	0.0180751	0.552166	314278	0.0165785	0.00284463
rs62172372	G	A	0.19	0.3365	0.0416	5.99e-16	265046	-0.0179522	0.0222771	0.420326	314278	0.0283167	0.00350067
rs12501032	G	C	0.31	0.2878	0.0362	1.83e-15	265046	-0.018336	0.0189168	0.332399	314278	0.0236075	0.00296939
rs12889267	G	A	0.16	0.4164	0.0453	3.61e-20	265046	-0.036669	0.0234244	0.117485	314278	0.0344325	0.00374589
rs11920570	A	G	0.26	0.2676	0.0371	5.18e-13	265046	-0.0327621	0.0197809	0.0976719	314278	0.0225835	0.00313097
rs1549118	T	C	0.28	0.2003	0.0367	4.67e-08	265046	0.00761478	0.0195581	0.697024	314278	0.0166944	0.00305883
rs79121763	T	C	0.09	-0.471	0.0629	7.17e-14	265046	0.0466433	0.0305553	0.126882	314278	-0.0359341	0.00479884
rs61735998	T	G	0.02	-0.8338	0.109	2.06e-14	265046	-0.0118894	0.0554637	0.830263	314278	-0.0750384	0.00980953
rs17265513	C	T	0.19	0.2398	0.042	1.12e-08	265046	0.0332576	0.0217494	0.126233	314278	0.0199884	0.00350089
rs16974196	A	G	0.32	0.2436	0.0359	1.11e-11	265046	0.0100825	0.0188387	0.592512	314278	0.0199775	0.00294413
rs11083258	C	A	0.17	-0.2761	0.0445	5.51e-10	265046	0.00130491	0.0230648	0.954883	314278	-0.0226848	0.0036562

## Sheet: rhr_Ruben16_30_AD_ukb_pa_gsmr_s
SNP	a1	a2	a1_freq	bzx	bzx_se	bzx_pval	bzx_n	bzy	bzy_se	bzy_pval	bzy_n	std_bzx	std_bzx_se
rs12576326	G	A	0.34	0.2528	0.0356	1.2e-12	265046	-0.00144057	0.0252385	0.954483	314278	0.0205873	0.00289916
rs17201923	G	A	0.28	-0.4096	0.0367	6.55e-29	265046	-0.0143461	0.0265512	0.588978	314278	-0.0341327	0.00305828
rs1320761	T	C	0.11	0.9018	0.0531	1.22e-64	265046	-0.0169406	0.0405438	0.676069	314278	0.0745097	0.0043873
rs1483890	G	A	0.3	0.2836	0.0359	2.54e-15	265046	0.00787629	0.0262374	0.76403	314278	0.0236742	0.00299684
rs7612445	T	G	0.19	-0.4276	0.042	2.41e-24	265046	-0.0133425	0.0308329	0.665207	314278	-0.0356376	0.00350042
rs1260326	C	T	0.39	-0.2746	0.0338	4.29e-16	265046	0.0171807	0.0245424	0.483903	314278	-0.0228748	0.00281561
rs12713404	T	G	0.38	-0.1992	0.0347	9.33e-09	265046	-0.00256396	0.0248268	0.917746	314278	-0.0162431	0.0028295
rs75190942	A	C	0.09	-0.4962	0.0599	1.19e-16	265046	0.0421408	0.0415095	0.310009	314278	-0.0397517	0.00479873
rs13002735	C	A	0.24	-0.3305	0.0387	1.29e-17	265046	0.0363432	0.028081	0.195588	314278	-0.0274608	0.00321553
rs4868243	A	G	0.16	-0.361	0.0444	4.08e-16	265046	-0.0149295	0.0327988	0.648977	314278	-0.0304575	0.00374602
rs2358740	T	G	0.32	-0.2079	0.0352	3.58e-09	265046	0.0227341	0.0254996	0.372638	314278	-0.0173891	0.00294419
rs4963772	A	G	0.15	-0.7139	0.0465	3.23e-53	265046	0.059092	0.033164	0.0747811	314278	-0.0590284	0.00384482
rs7173389	T	A	0.16	-0.5393	0.0453	1.31e-32	265046	0.0201364	0.0327267	0.538365	314278	-0.0445903	0.00374549
rs1050288	T	C	0.34	-0.2125	0.0357	2.74e-09	265046	0.0114846	0.0254781	0.65216	314278	-0.0172574	0.00289924
rs3915499	A	G	0.32	0.303	0.0354	1.24e-17	265046	0.0410551	0.0257663	0.11108	314278	0.0251985	0.00294398
rs2152735	A	G	0.33	-0.3061	0.0355	7.23e-18	265046	0.027327	0.0256512	0.286727	314278	-0.0251828	0.00292058
rs272564	C	A	0.28	0.351	0.0373	4.51e-21	265046	0.0065622	0.0268237	0.806734	314278	0.0287809	0.00305849
rs41312411	G	C	0.15	-0.32	0.047	1.34e-11	265046	0.00520454	0.0336235	0.876988	314278	-0.0261869	0.0038462
rs6845865	C	T	0.16	-0.3423	0.0448	2.25e-14	265046	-0.0290423	0.0331805	0.381422	314278	-0.0286224	0.00374608
rs4900069	C	A	0.37	0.1999	0.0343	5.38e-09	265046	0.00795032	0.0247885	0.748418	314278	0.0165785	0.00284463
rs62172372	G	A	0.19	0.3365	0.0416	5.99e-16	265046	0.0328852	0.0303223	0.278137	314278	0.0283167	0.00350067
rs12501032	G	C	0.31	0.2878	0.0362	1.83e-15	265046	-0.0191416	0.025925	0.460305	314278	0.0236075	0.00296939
rs11920570	A	G	0.26	0.2676	0.0371	5.18e-13	265046	0.00565114	0.0270007	0.834217	314278	0.0225835	0.00313097
rs1549118	T	C	0.28	0.2003	0.0367	4.67e-08	265046	0.00813833	0.0268194	0.761548	314278	0.0166944	0.00305883
rs79121763	T	C	0.09	-0.471	0.0629	7.17e-14	265046	-0.0694735	0.0427111	0.103825	314278	-0.0359341	0.00479884
rs61735998	T	G	0.02	-0.8338	0.109	2.06e-14	265046	-0.132705	0.0777929	0.0880312	314278	-0.0750384	0.00980953
rs2076028	A	G	0.29	-0.2949	0.0364	5.45e-16	265046	0.0209728	0.0263717	0.426454	314278	-0.0245197	0.00302651
rs17265513	C	T	0.19	0.2398	0.042	1.12e-08	265046	0.0422499	0.0297514	0.155579	314278	0.0199884	0.00350089
rs16974196	A	G	0.32	0.2436	0.0359	1.11e-11	265046	-0.0114191	0.0258685	0.658903	314278	0.0199775	0.00294413
rs11083258	C	A	0.17	-0.2761	0.0445	5.51e-10	265046	-0.0227636	0.0316681	0.472254	314278	-0.0226848	0.0036562

## Sheet: rhr_Ruben16_31_AD_ukb_meta2_Kun
SNP	a1	a2	a1_freq	bzx	bzx_se	bzx_pval	bzx_n	bzy	bzy_se	bzy_pval	bzy_n	std_bzx	std_bzx_se
rs12576326	G	A	0.34	0.2528	0.0356	1.2e-12	265046	-0.0306	0.0169	0.07009	63926	0.0205873	0.00289916
rs17201923	G	A	0.28	-0.4096	0.0367	6.55e-29	265046	0.0136	0.0157	0.3871	63926	-0.0341327	0.00305828
rs1320761	T	C	0.11	0.9018	0.0531	1.22e-64	265046	0.0285	0.0239	0.2334	63926	0.0745097	0.0043873
rs1483890	G	A	0.3	0.2836	0.0359	2.54e-15	265046	-0.0028	0.0155	0.8563	63926	0.0236742	0.00299684
rs7612445	T	G	0.19	-0.4276	0.042	2.41e-24	265046	0.0134	0.0179	0.4549	63926	-0.0356376	0.00350042
rs1260326	C	T	0.39	-0.2746	0.0338	4.29e-16	265046	-0.0147	0.0145	0.3099	63926	-0.0228748	0.00281561
rs12713404	T	G	0.38	-0.1992	0.0347	9.33e-09	265046	-0.0157	0.0148	0.2876	63926	-0.0162431	0.0028295
rs75190942	A	C	0.09	-0.4962	0.0599	1.19e-16	265046	0.0198	0.0328	0.5461	63926	-0.0397517	0.00479873
rs13002735	C	A	0.24	-0.3305	0.0387	1.29e-17	265046	-0.0128	0.0165	0.4389	63926	-0.0274608	0.00321553
rs4868243	A	G	0.16	-0.361	0.0444	4.08e-16	265046	-0.0183	0.0198	0.3545	63926	-0.0304575	0.00374602
rs2358740	T	G	0.32	-0.2079	0.0352	3.58e-09	265046	-0.0139	0.0152	0.3588	63926	-0.0173891	0.00294419
rs4963772	A	G	0.15	-0.7139	0.0465	3.23e-53	265046	0.0082	0.0197	0.6768	63926	-0.0590284	0.00384482
rs7173389	T	A	0.16	-0.5393	0.0453	1.31e-32	265046	0.0231	0.0195	0.2345	63926	-0.0445903	0.00374549
rs1050288	T	C	0.34	-0.2125	0.0357	2.74e-09	265046	0.001	0.0166	0.9497	63926	-0.0172574	0.00289924
rs3915499	A	G	0.32	0.303	0.0354	1.24e-17	265046	-0.004	0.0153	0.7928	63926	0.0251985	0.00294398
rs2152735	A	G	0.33	-0.3061	0.0355	7.23e-18	265046	0.0036	0.0154	0.814	63926	-0.0251828	0.00292058
rs272564	C	A	0.28	0.351	0.0373	4.51e-21	265046	-0.0073	0.0159	0.6488	63926	0.0287809	0.00305849
rs41312411	G	C	0.15	-0.32	0.047	1.34e-11	265046	-0.0193	0.0202	0.3384	63926	-0.0261869	0.0038462
rs41317993	A	G	0.1	0.6304	0.0545	5.42e-31	265046	0.0156	0.025	0.5329	63926	0.0529436	0.00457713
rs6845865	C	T	0.16	-0.3423	0.0448	2.25e-14	265046	-0.013	0.0198	0.512	63926	-0.0286224	0.00374608
rs4900069	C	A	0.37	0.1999	0.0343	5.38e-09	265046	-0.0027	0.0147	0.8535	63926	0.0165785	0.00284463
rs12501032	G	C	0.31	0.2878	0.0362	1.83e-15	265046	0.0115	0.0162	0.4765	63926	0.0236075	0.00296939
rs12889267	G	A	0.16	0.4164	0.0453	3.61e-20	265046	-0.0247	0.0206	0.2311	63926	0.0344325	0.00374589
rs11920570	A	G	0.26	0.2676	0.0371	5.18e-13	265046	-0.0043	0.0163	0.7925	63926	0.0225835	0.00313097
rs1549118	T	C	0.28	0.2003	0.0367	4.67e-08	265046	0.0191	0.0156	0.2211	63926	0.0166944	0.00305883
rs79121763	T	C	0.09	-0.471	0.0629	7.17e-14	265046	-0.0422	0.0298	0.1564	63926	-0.0359341	0.00479884
rs61735998	T	G	0.02	-0.8338	0.109	2.06e-14	265046	0.0388	0.0563	0.4914	63926	-0.0750384	0.00980953
rs2076028	A	G	0.29	-0.2949	0.0364	5.45e-16	265046	-0.0272	0.0161	0.08972	63926	-0.0245197	0.00302651
rs17265513	C	T	0.19	0.2398	0.042	1.12e-08	265046	0.0272	0.0189	0.1515	63926	0.0199884	0.00350089
rs16974196	A	G	0.32	0.2436	0.0359	1.11e-11	265046	0.026	0.0163	0.1104	63926	0.0199775	0.00294413
rs11083258	C	A	0.17	-0.2761	0.0445	5.51e-10	265046	0.0019	0.0197	0.9246	63926	-0.0226848	0.0036562
